# Supplementary material for: A survey of Bacterial and Fungal Community Structure and Functions in Two Long-term Metalliferous Soil Habitats
Source: Research Square preprint supplement (doi:10.21203/rs.3.rs-6414247/v1), 2025-06-25
Supplement: Supplementary file 1 [file daf23b98be56dea151a765c7.docx]

**Table 1.** The samples shown below were collected from the Savannah River Site (SSRS) and the Oak Ridge Reservation (ORR) for this study.

| **Core ID** | **Sample Date** | **GPS coordinates** | **Remarks** | **Contamination Level** |
| --- | --- | --- | --- | --- |
| R1 | 12/6/17 | 33.163340/-81.745884 | Reference | Low |
| R2 | 12/6/17 | 33.163340/-81.745884 | Reference | Low |
| SRSS-1 | 12/6/17 | 33.167806/-81.746851 | Contaminated | Medium |
| SRSS-2 | 12/6/17 | 33.167806/-81.746851 | Contaminated | Medium |
| SRSS-3 | 12/6/17 | 33.167806/-81.746851 | Contaminated | Low |
| SRSS-4 | 12/6/17 | 33.167806/-81.746851 | Contaminated | Low |
| HO2-1 | 12/7/17 | 33.2955833/-81.64472 | Contaminated | Low |
| HO2-2 | 12/7/17 | 33.286257/-81.633443 | Contaminated | Low |
| SoilA | 12/5/17 | 35.966325/-84.357854 | Contaminated | High |
| SoilB | 12/5/17 | 35.966325/-84.357854 | Contaminated | High |
| SoilC | 12/5/17 | 35.966325/-84.357854 | Contaminated | High |
